# Supplementary material for: Cancer Stem Cells Regulate Cancer-Associated Fibroblasts via Activation of Hedgehog Signaling in Mammary Gland Tumors
Source: Oxford University Press journal article supplement (doi:10.1158/0008-5472.can-15-3490), 2017-02-15
Supplement: 00085472can153490-sup-160006_2_supp_3797640_ccn5r6.xlsx [file 00085472can153490-sup-160006_2_supp_3797640_ccn5r6.xlsx]

## Sheet: Primers and Antibodies
List of primers and relative sequences used for qRT-PCR
Gene Name	Forward Primer 5’→3’	Reverse Primer 5’→3’
Actb	TCGTGCGTGACATCAAAGAGAAGC	ATGGATGCCACAGGATTCCATACC
Adipoq	GTCACTGTTCCCAATGTACC	TTCCTGATACTGGTCGTAGG
Bglap	CTGACAAAGCCTTCATGTCC	GATACCATAGATGCGTTTGTAGG
Ccnd1	AAGTTCATTTCCAACCCACCCTCC	AGAAGGGCTTCAATCTGTTCCTGG
CD24	CTCCTACCCACGCAGATTTA	GAGTAGAGATGCAGAAGAGAGAG
Ctgf	TTCTAAGACCTGTGGGATGG	AGAAAGCTCAAACTTGACAGG
Cxcl12	CATCAGTGACGGTAAACCAG	GGTACTCTTGGATCCACTTTAAT
Egfr	TCAAATACTGCACTGCCATCAGCG	ACCATGTTGCTTTGTTCTGCCACG
Eng (CD105)	CACGTTCTCTTCCTGGATTT	AACATCACAGTGCTACCATC
Epcam	AACACAAGACGACGTGGACATAGC	AATGACACCACCACAATGACAGCG
Erbb3	CTACGACTGGCTGAAATACC	CTCTCTTGATGACCAGATACC
Ereg	GTTCAGATGGAAGACGATCC	ACGTATTCTTTGCTCAAGGG
Fgf7	GCTCTACAGATCATGCTTCC	CAGTCTTCTCACCCTTATATCC
Fn	TGAGCGACATGCTCTACAAAGTGC	TGCTTGTTTCCTTGCGACTTCAGC
Gas6	GAGTGTGTCCAGAAGAATGG	GCTGTATGTATATCCCTCATCG
Gli1	CTCCACCACAAGTCAATAGC	GGAGGAGGAAAGAGAGATCC
Hgf	ACCCTGGTGTTTCACAAGCAATCC	TCTTTCTGGCAAGAACTTGTGCCG
Igf1	AACAACAAACGAAAGCCTGGAGCC	AAGAAACCAGGACTCCCAAATCCC
Itga6 (CD49f)	CCCGAGAAGGAAATCAAGAC	GAACTGAAGAACGACCTCTAC
Itgb4	TTTCAATGTAGTCTCTTCTACGG	CTTAACCGTGTATCGGTATGG
K5	ATGTTCTTTGATGCGGAGCTGTCC	ATCTCGTGCTTGGTGTTTCGAAGG
K8	TGATGTCGTGTCCAAGTGAATGGC	ACTGAATTGGGTTTGGATGGGAGG
K14	TGAGAGCCTCAAGGAGGAGC	TCTCCACATTGACGTCTCCAC
Mmp9	CTGGACAGCCAGACACTAAAG	CTCGCGGCAAGTCTTCAGAG
Muc1	ATCATTCCAGACCACAATGGCTCC	TGTGCTATAGTAAGAGCTGCTGGC
Pdgfb	GTGAGAAAGATTGAGATTGTGC	CTTAAACTTTCGGTGCTTGC
Pdgfc	CCGAAGTTTCCTCATACATACC	TTCCTTTAGAAGTCTGCTTTCC
Pdgfra (CD140a)	AACATTGTGAACTTGCTGGGAGCC	TTGCTTCATGTCCATGTAGTCGCC
Pdgfrb (CD140b)	AGCGAGAAGCAAGCCTTAATGTCC	AAGAAGGTGTGTTTGTTCCGGTGC
P4hb	ACAATCAGCTGCCTTTGGTCATCG	AATAGGATCTTGCCCTTGAAGCCC
Postn	AACCATTGGAGGCAAACAACTCCG	TCAAATCTGCAGCTTCAAGGAGGC
Ptch1	ATCAACTGGAATGAAGACAGG	CATAGGCAAGCATCAGTAGG
Ptch2	CTACCAGACACATGACATCG	TAAGCAGATAGCCTCCTACC
Prlr	ATGATGACCTGCATCTTTCC	CCTCATTGTCATCCACTTCC
Rpl19	CATATGTATCACAGCCTGTACC	TTGATGATCTCTTCCTTCTTGG
Shh	AGCAGTTTATTCCCAACGTAGCCG	TCTTTGCACCTCTGAGTCATCAGC
SMA	TGATCACCATTGGAAACGAACG	TGGTTTCGTGGATGCCCGCT
Thy1 (CD90)	AGCCCTATATCAAGGTCCTTACCC	TCACAGAGAAATGAAGTCCAGGGC
Tgfb3	CGAACCTAAGGGTTACTATGC	CACATAGTACAAGATGGTCAGG
Tgfbr2	ACAACATCAACCACAACACGGAGC	TGCAGGATGTTCTCATGCTTCAGG
Tnc	AAGACTGCAAAGAGCAAAGGTGCC	ACACACATTGTCCTTGGTTGCTGC
Vim	ATGACCGCTTTGCCAACTACATCG	ATCTCCTCCTGCAATTTCTCTCGC
Wnt5b	GAGAAGAACTTTGCCAAGGG	GTCGTACTTCTCCTTCAAACG
Slug	TGGTCAAGAAACATTTCAACGCC	GGTGAGGATCTCTGGTTTTGGTA
Twist	GGACAAGCTGAGCAAGATTCA	CGGAGAAGGCGTAGCTGAG
Snail	CACACGCTGCCTTGTGTCT	GGTCAGCAAAAGCACGGTT
Zeb1	GCTGGCAAGACAACGTGAAAG	GCCCTCAGGATAAATGACGGC
List of primary antibodies used for Immunofluorescence/Immunohistochemistry
Gene Name	Manufacturer	Dilution
rat anti-CD49f	BD Biosciences	1:50
biotin anti-CD140b	Biolegends	1:100
mouse anti-Fibronectin	BD Biosciences	1:200
goat anti-GFP	Abcam	1:100
rabbit anti-GFP	Abcam	1:100
mouse anti-GM130	BD Biosciences	1:250
rabbit anti-K5	Covance	1:1000
guinea pig anti-K8	Progen	1:50
rabbit anti-Laminin	Sigma-Aldrich	1:500
rabbit anti-PTCH1	Dr. Annabel Christ, MDC	1:250
rabbit anti-SHH	Santa Cruz	1:25
rabbit anti-SMA	Abcam	1:50
goat anti-Vimentin	Santa Cruz	1:50
rabbit anti-Ki67	NEO Markers/Lab Vision RM-9106	1:200
List of primary antibodies used for FACS
Gene Name	Manufacturer	Dilution
rat PE anti-CD24	BD Biosciences	1:400
rat FITC anti-CD49f	BD Biosciences	1:50
APC-Cy7 anti-CD90.1	BD Biosciences	1:100
biotin anti-CD140b	Biolegends	1:100
