# Supplementary material for: Cancer Stem Cells Regulate Cancer-Associated Fibroblasts via Activation of Hedgehog Signaling in Mammary Gland Tumors
Source: Oxford University Press journal article supplement (doi:10.1158/0008-5472.can-15-3490), 2017-02-15
Supplement: 00085472can153490-sup-160006_2_supp_3797760_bbn5s0.xlsx [file 00085472can153490-sup-160006_2_supp_3797760_bbn5s0.xlsx]

## Sheet: Foglio1
CAF ligand - CSC receptor interactions
CAF ligand	CSC receptor
CHL1	PTPRA
CP	SLC11A1
	SLC40A1
CSF2	CSF2RA
	CSF2RB
CTGF	FGFR2
	FGFR3
CXCL12	CXCR4
	CXCR7
CXCL14	CXCR4
EREG	EGFR
FGF7	FGFR1
	FGFR2
	FGFR3
GAS6	AXL
IGF1	IGF1R
	IGF2R
IL33	IL1RAP
	IL1RL1
INHBA	ACVR1A
	ACVR1B
	ACVR2A
LBP	CD14
LIF	IL6ST
	LIFR
NOV	DDR1
	GJA1
	ITGAV
	ITGB5
	NOTCH1
SFRP1	FZD6
TNC	EGFR
	ITGA9
	ITGAV
	ITGB1
VCAN	CD44
